# Supplementary material for: CXCR5 Regulates Neuronal Polarity Development and Migration in the Embryonic Stage via F-Actin Homeostasis and Results in Epilepsy-Related Behavior
Source: PubMed Central journal article supplement (PMC10603003; doi:10.1007/s12264-023-01087-w), 2023-07-17
Supplement: 12264_2023_1087_MOESM1_ESM.pdf [file 12264_2023_1087_MOESM1_ESM.pdf]

## Supplementary Material

**Table S1** Specific information of plasmid vectors, viral vectors, antibodies, and reagents

| Reagent                                              |        | Source      | Identifier       |
|------------------------------------------------------|--------|-------------|------------------|
| <b>Adeno-associated Virus</b>                        |        |             |                  |
| pAAV-U6-shRNA(CXCR5)-CMV-EGFP-WPRE                   |        |             |                  |
| pAAV-U6-shRNA(NC2)-CMV-EGFP-WPRE                     |        | OBiO        |                  |
| pAAV-hysn-CXCR5-mCherry-WPRE                         |        | Technology  |                  |
| pAAV-hysn-mCherry -WPRE                              |        |             |                  |
| <b>Plasmid</b>                                       |        |             |                  |
| pAAV-U6-shRNA(Cxcr5)-CMV- EGFP-WPRE                  |        |             |                  |
| pAAV-U6-shRNA(NC2)-CMV-EGFP-WPRE                     |        | OBiO        |                  |
| pAAV-hSyn-mCherry-P2A-Cxcr5-3xFLAG- WPRE             |        | Technology  |                  |
| pAAV-hSyn-mCherry-P2A-3xFLAG-WPRE                    |        |             |                  |
| <b>Antibody</b>                                      |        |             |                  |
| CXCR5 Rabbit mAb                                     | 1:1000 | ZENBIO      | Cat# R24019      |
| CXCR5 mouse mAb                                      | 1:1000 | Santa Cruz  | Cat# sc-373775   |
| Beta tubulin mouse mAb                               | 1:4000 | Proteintech | Cat#66009-1-Ig   |
| Beta-actin rabbit pAb                                | 1:5000 | Proteintech | Cat# 20536-1-AP  |
| Phospho-Cofilin (Ser3) Rabbit pAb                    | 1:500  | ZENBIO      | Cat# 310036      |
| Cofilin Rabbit pAb                                   | 1:500  | ZENBIO      | Cat# 310140      |
| Anti-F-actin mouse mAb                               | 1:1000 | Abcam       | Cat# ab205       |
| CXCL13 rabbit pAb                                    | 1:1000 | GeneTex     | Cat# GTX108471   |
| Anti-CXCR5 rabbit mAb                                | 1:5000 | Abcam       | Cat# ab254415    |
| GFAP mouse mAb                                       | 1:2000 | ZENBIO      | Cat# 250027      |
| MAP2 mouse mAb                                       | 1:2000 | ZENBIO      | Cat# 250035      |
| Na <sup>+</sup> /K <sup>+</sup> -ATPase mouse mAb    | 1:200  | SANTA CRUZ  | Cat# sc-514614   |
| Anti-mCherry mouse pAb                               | 1:500  | Proteintech | Cat# 26765-1-AP  |
| Anti-GFP mouse pAb                                   | 1:500  | Abcam       | Cat# ab1218      |
| Oct-4 Rabbit pAb                                     | 1:500  | ZENBIO      | Cat# 381335      |
| SSEA4 mouse mAb                                      | 1:500  | Abcam       | Cat# ab16287     |
| Nestin rabbit pAb                                    | 1:500  | ZENBIO      | Cat# 381211      |
| PAX6 mouse mAb                                       | 1:500  | Proteintech | Cat# 6964-1-Ig   |
| GFP mouse mAb                                        | 1:500  | Abcam       | Cat# ab1218      |
| mCherry rabbit pAb                                   | 1:500  | Proteintech | Cat# 26765-1- AP |
| HRP-conjugated Affinipure Goat Anti-Mouse IgG (H+L)  | 1:5000 | Proteintech | Cat# SA00001-1   |
| HRP-conjugated Affinipure Goat Anti-Rabbit IgG (H+L) | 1:400  | Proteintech | Cat# SA00001-2   |
| CoraLite594-conjugated Donkey Anti-Rabbit IgG (H+L)  | 1:400  | Proteintech | Cat #SA00013-8   |
| CoraLite488-conjugated Donkey Anti-Mouse IgG (H+L)   |        | Proteintech | Cat #SA00013-5   |

**Cell Culture**

|                                                                                          |                       |                  |
|------------------------------------------------------------------------------------------|-----------------------|------------------|
| DMEM/F-12                                                                                | Gibco                 | Cat #11320033    |
| Human serum                                                                              | Sigma                 | Cat # SLCF0694   |
| Penicillin/streptomycin/neomycin                                                         | Gibco                 | Cat # 15640055   |
| NutriFreez D10 Cryopreservation Medium                                                   | Biological industries | Cat# 2144029     |
| Accutase                                                                                 | STEMCELL              | Cat #07920       |
| EDTA                                                                                     | Invitrogen            | Cat# 01032272    |
| BD Matrigel hESC-qualified Matrix                                                        | Biological Industries | Cat# 354227      |
| Laminin                                                                                  | Sigma-Aldrich         | Cat# 114956-81-9 |
| poly-D-lysine                                                                            | Sigma-Aldrich         | Cat# 27964-99-4  |
| NutriStem hPSC XF Medium                                                                 | Biological Industries | Cat# 2132733     |
| StemRNA 3rd Gen Reprogramming Kit for Reprogramming Adult and Neonatal Human Fibroblasts | Stemgent              | Cat# 00-0076     |
| Lipofectamine RNAiMAX Transfection Reagent                                               | Invitrogen            | Cat# 2341058     |
| LDN193189                                                                                | MedChemExpress        | Cat# HY-12071    |
| SB431524                                                                                 | MedChemExpress        | Cat# HY-12848    |
| N2 Supplement                                                                            | Gibco                 | Cat# 17502001    |
| B27 supplement                                                                           | Gibco                 | Cat# 2313316     |
| Neurobasal Medium                                                                        | Gibco                 | Cat# 21103049    |
| Insulin-Transferrin-Selenium-Sodium Pyruvate (ITS-A)                                     | Gibco                 | Cat# 51300044    |
| GlutaMAX Supplement                                                                      | Gibco                 | Cat# 35050061    |
| Human FGF-basic (FGF-2/bFGF)                                                             | Gibco                 | Cat# 13256-029   |
| EGF                                                                                      | Gibco                 | Cat# PHG0314     |
| 96-well Ultra-Low Attachment Microplate                                                  | Corning               | Cat# 7007        |

**Animal reagents**

|                   |               |                  |
|-------------------|---------------|------------------|
| Pentylentetrazole | Sigma-Aldrich | Cat# 54-95-5     |
| kainic acid       | Sigma-Aldrich | Cat# 487-79-6    |
| Jasplakinolide    | Sigma-Aldrich | Cat# 102396-24-7 |

---
